# Supplementary material for: Folate Receptor-Targeting Gold Nanoclusters as Fluorescence Enzyme Mimetic Nanoprobes for Tumor Molecular Colocalization Diagnosis
Source: PubMed Central journal article supplement — Theranostics. 2014 Jan 2;4(2):142–53. doi: 10.7150/thno.7266 (PMC3900799; doi:10.7150/thno.7266), 2014-01-02
Supplement: thnov04p0142s1.pdf [file thnov04p0142s1.pdf]

# Supplementary Material

## **Folate Receptor-Targeting Gold Nanoclusters as Fluorescence Enzyme Mimetic Nanoprobes for Tumor Molecular Colocalization Diagnosis**

Dehong Hu<sup>△</sup>, Zonghai Sheng<sup>△</sup>, Shengtao Fang, Yanan Wang, Duyang Gao, Pengfei Zhang, Ping Gong, Yifan Ma, and Lintao Cai<sup>✉</sup>

Guangdong Key Laboratory of Nanomedicine, CAS Key Laboratory of Health Informatics, Shenzhen Institutes of Advanced Technology, Chinese Academy of Sciences, Shenzhen, 518055, China

✉ Corresponding Author

Professor Lintao Cai

Shenzhen Institutes of Advance Technology, Chinese Academy of Science, 1068 Xueyuan Avenue, Shenzhen University Town, Shenzhen, P. R. China 518055.

Tel: +86-755-86392210

Fax: +86-755-86392299

Email address: [lt.cai@siat.ac.cn](mailto:lt.cai@siat.ac.cn)

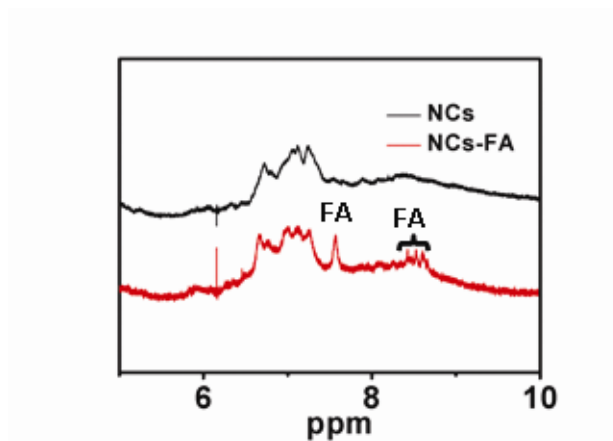

**Figure. S1.**  $^1\text{H}$  NMR spectra of NCs and the NCs-FA nanoprobes.

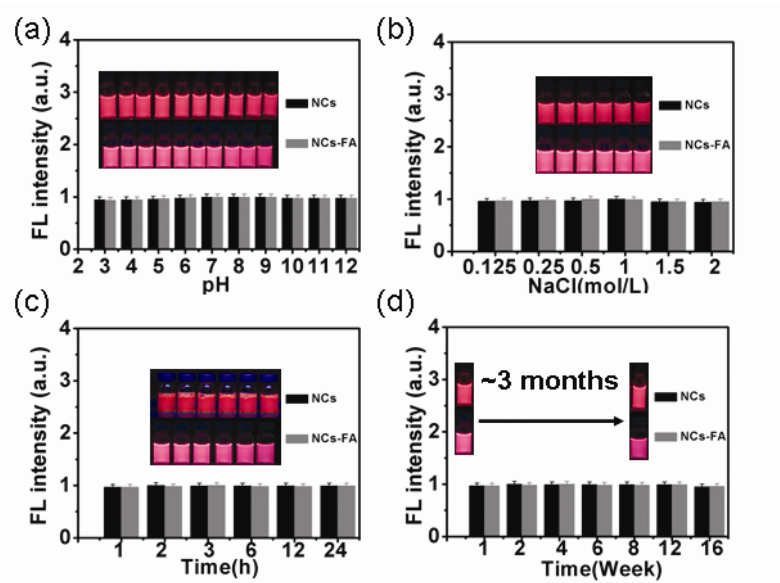

**Figure. S2.** Effects of pH (a), salt (b), photo-irradiation (c) and storage time (d) on the fluorescence intensity of the NCs and the NCs-FA nanoprobes.

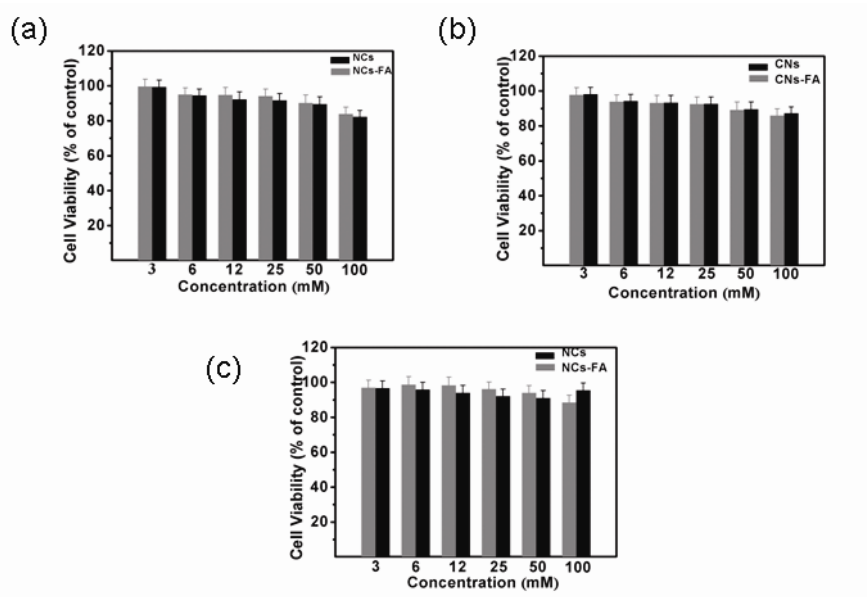

**Figure. S3.** Cytotoxicity studies of NCs and the NCs-FA nanoprobe. (a) HepG2, (b) MCF-7 and (c) 293T tumor cells in 96-well plates were incubated with NCs and the NCs-FA nanoprobe in a wide range of concentrations for 24 h. Error bars represent the standard deviation of five measurements.

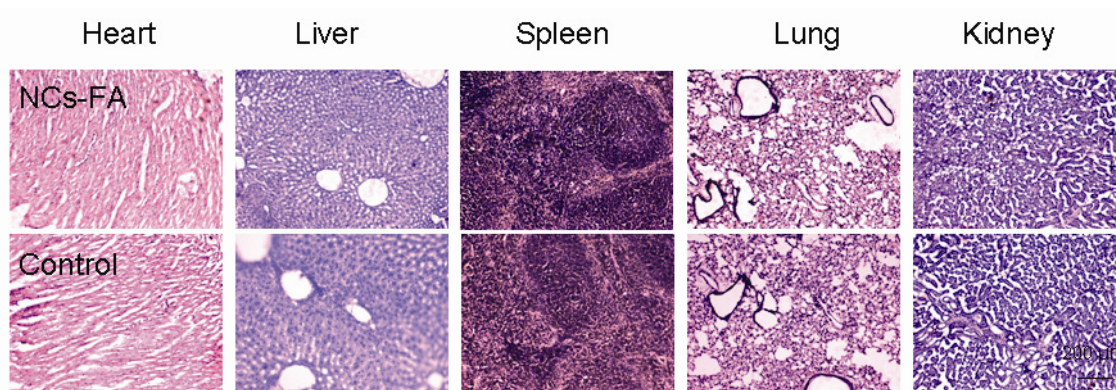

**Figure. S4.** Histological changes in the heart, liver, spleen, lung and kidney of the rat 30 days after intravenous injection of a high dose of the NCs-FA nanoprobe. These organs are stained with H&E. The control shows the organ images of the rat without injection of the NCs-FA nanoprobe.

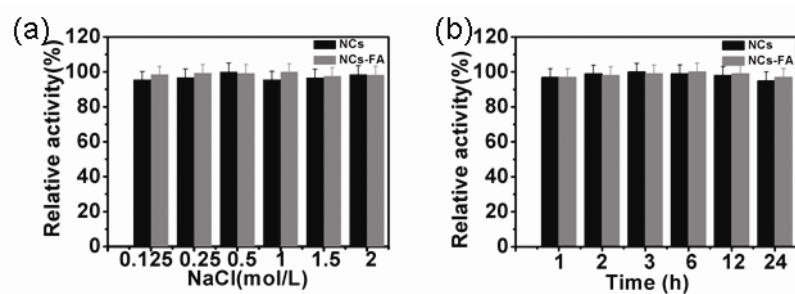

**Figure. S5.** Effects of salt (a) and photo-irradiation (b) on the catalytic activity of the NCs and the NCs-FA nanoprobcs.

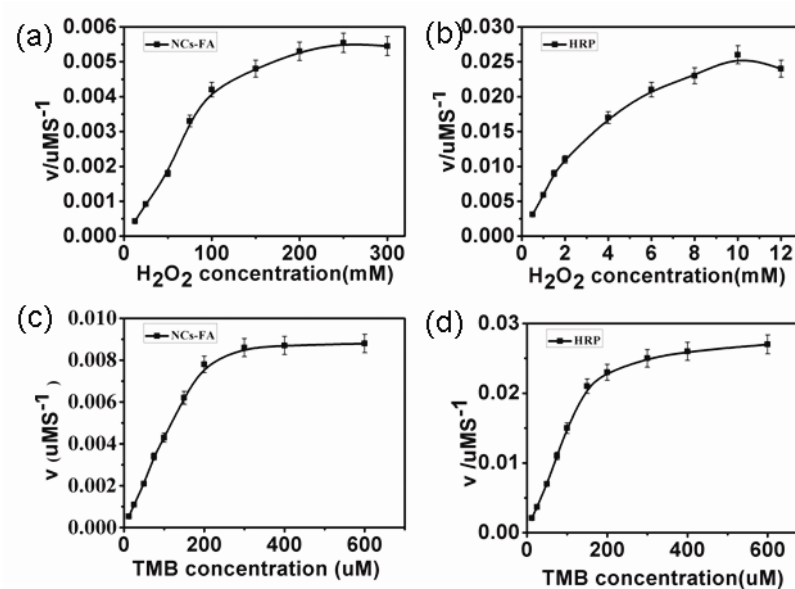

**Figure. S6.** Effect of  $\text{H}_2\text{O}_2$  (a, b) and TMB (c, d) concentration on the reaction rate of TMB oxidation catalyzed by the NCs-FA nanoprobcs (a, c) and HRP (b, d).

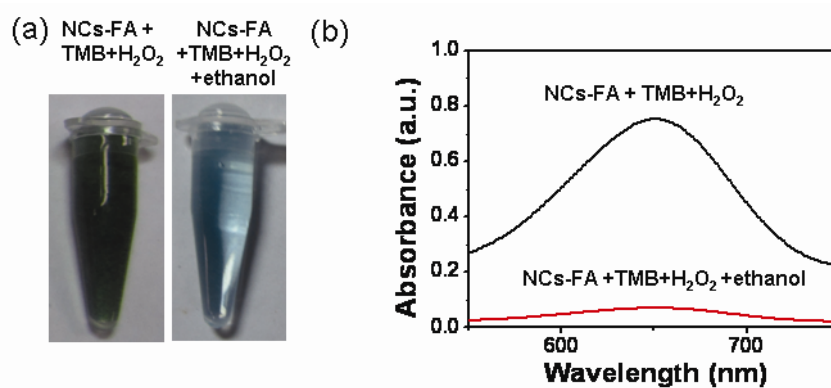

**Figure. S7.** (a) Peroxidase activity of the NCs-FA nanoprobe with (right tube) or without (left tube) the  $\bullet$ OH scavenger ethanol. The NCs-FA nanoprobe catalyzed the oxidation of peroxidase substrate TMB in the presence of H<sub>2</sub>O<sub>2</sub> to give a colored product. (b) Absorbance of the TMB reaction solution catalyzed by the NCs-FA nanoprobe with or without the  $\bullet$ OH scavenger ethanol.

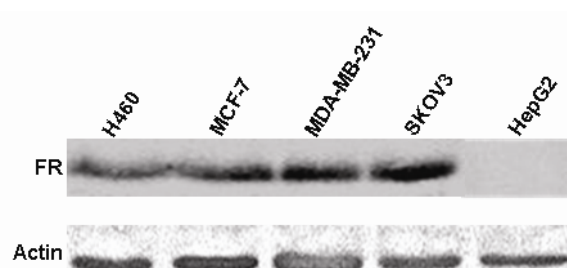

**Figure. S8.** Western blot of FR expression in H460, MCF-7, MDA-MB-231, SKOV3 and HepG2, actin was used as a loading control.

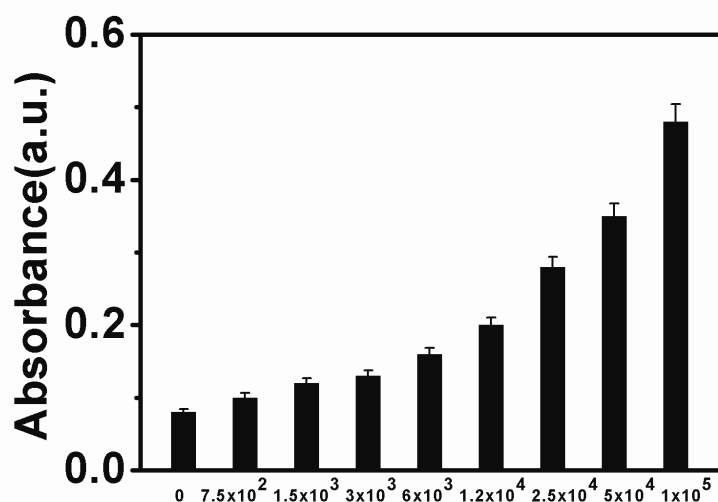

**Figure. S9.** The tumor targeting capability of the NCs-FA nanoprobe in tumor cell. The absorption values at 652 nm after 600 s depend on the number of MCF-7 cells. The data were represented as mean  $\pm$  standard deviation, n=5/group.

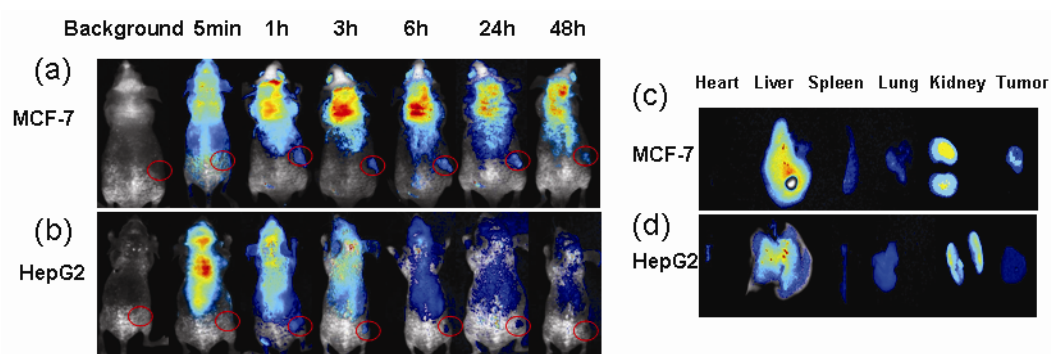

**Figure. S10.** Tumor-targeting investigation of the NCs-FA nanoprobe in nude mice bearing MCF-7 and HepG-2 tumor xenograft monitored by NIR fluorescence imaging system. (a) NIR Fluorescence images of the MCF-7 tumor-bearing mice model after administration of the NCs-FA nanoprobe within 48 h. (b) NIR Fluorescence images of the HepG-2 tumor-bearing mice model after administration of the NCs-FA nanoprobe within 48 h. (c) The MCF-7 tumor-bearing mice and (d) HepG-2 tumor-bearing mice were sacrificed and performed a thoracotomy at 6 h post injection. Red dotted circle indicate the tumor site.

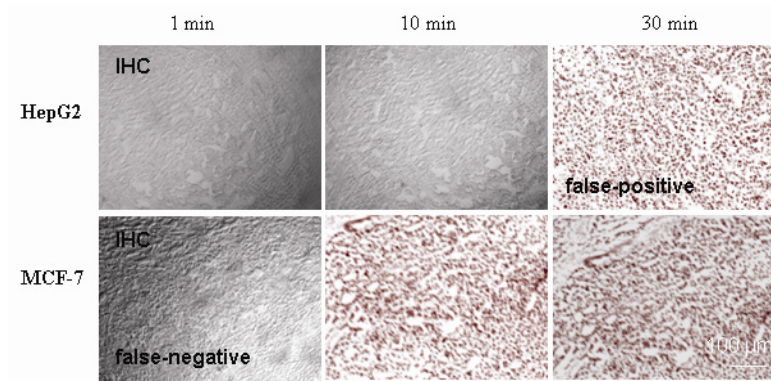

**Figure. S11.** False-positive and false-negative of IHC. The section from MCF-7 and HepG-2 tumor tissues were stained with IHC, and fixated 1 min, 10 min and 30 min, respectively. HepG-2 tumor section showed negative staining, negative staining and positive staining with HRP-peroxidase staining for 1 min, 10 min and 30 min. On the contrary, MCF-7 tumor section showed negative staining, positive staining and positive staining with HRP-Abs staining for 1 min, 10 min and 30 min.
